# Supplementary material
Source: PubMed Central journal article supplement (PMC6233630)
Supplement: jama-320-1151-s001.pdf [file jama-320-1151-s001.pdf]

## Supplementary Online Content

Ossenkoppele R, Rabinovici GD, Smith R, et al. Discriminative Accuracy of [18F]flortaucipir Positron Emission Tomography for Alzheimer Disease vs Other Neurodegenerative Disorders. *JAMA*. doi:10.1001/jama.2018.12917

eTable 1. Diagnostic criteria

eTable 2. Methods to determine A $\beta$ -positivity across centers

eTable 3. PET and MRI protocols

eTable 4. Youden index to derive [18F]flortaucipir cut-offs

eTable 5. Subject characteristics by diagnostic group

eTable 6. Subject characteristics for each center

eTable 7. Diagnostic performance of partial volume corrected [18F]flortaucipir PET in distinguishing AD from non-AD neurodegenerative disease

eTable 8. Diagnostic performance of [18F]flortaucipir PET using a cut-off derived from the Youden Index in AD dementia vs non-AD neurodegenerative disorders

eTable 9. Diagnostic performance of [18F]flortaucipir PET using the closest cut-off at 95% sensitivity in AD dementia vs controls

eTable 10. Diagnostic performance of [18F]flortaucipir PET using the closest cut-off at 95% specificity in AD dementia vs controls

eTable 11. Diagnostic accuracy in combined A $\beta$ -positive and A $\beta$ -negative AD dementia patients vs non-AD neurodegenerative disorders

eTable 12. Tau-positivity in the temporal Meta-ROI by A $\beta$  status

eTable 13. Factors contributing to tau-negativity in AD dementia and tau positivity in non-AD neurodegenerative conditions in the temporal meta-ROI.

eTable 14. Tau-negativity in the temporal Meta-ROI in AD dementia by age

eTable 15. Combined assessment of temporal Meta-ROI flortaucipir and MRI measures

eTable 16. Specificity for [18F]flortaucipir in AD dementia versus non-AD neurodegenerative disorders and controls

eTable 17. Specificity for [18F]flortaucipir versus non-AD disorders and controls in younger and older patient groups

eFigure 1. Flow diagram of participant inclusion

eFigure 2. [18F]flortaucipir uptake in predefined ROIs per diagnostic group

(A. Entorhinal, B. Inferior temporal, C. Temporoparietal, D. Braak stage V/VI)

eFigure 3. [ $^{18}\text{F}$ ]flortaucipir SUVR in A $\beta$ -positive (A) and A $\beta$ -negative (B) participants

eFigure 4. Differences in specificity for [ $^{18}\text{F}$ ]flortaucipir PET versus A $\beta$  status

This supplementary material has been provided by the authors to give readers additional information about their work.

**eTable 1.** Diagnostic criteria

| Diagnosis                      | Criteria                                     | Ref |
|--------------------------------|----------------------------------------------|-----|
| Alzheimer disease dementia     | NIA-AA                                       | 1   |
| Mild cognitive impairment      | Petersen                                     | 2   |
| Prodromal AD                   | NIA-AA                                       | 3   |
| Behavioral variant FTD         | FTDC                                         | 4   |
| Non-fluent variant PPA         | Gorno-Tempini                                | 5   |
| Semantic variant PPA           | Gorno-Tempini                                | 5   |
| Dementia with Lewy bodies      | DLB consortium                               | 6   |
| Progressive supranuclear palsy | PSP study group                              | 7   |
| Corticobasal syndrome          | Armstrong                                    | 8   |
| Parkinson disease              | New International PD and MD Society criteria | 9   |
| Vascular dementia              | NINDS-AIREN                                  | 10  |

NIA-AA = National Institute on Aging and Alzheimer's Association workgroup; FTDC = International Behavioural Variant FTD Criteria Consortium; PD = Parkinson's disease; MD = Movement disorders; NINDS-AIREN = National Institute of Neurological Disorders (NINDS) and the Association Internationale pour la Recherche et l'Enseignement en Neurosciences (AIREN).

#### References:

1. McKhann GM, et al. Introduction of revised criteria for the diagnosis of AD: NIA-AA workgroup. *Alzheimer's & Dementia* 2011;7(3): 263-269.
2. Petersen, RC. Mild cognitive impairment. *J Int Med* 2004;256:183-194.
3. Albert MS, et al. The diagnosis of MCI due to AD: Recommendations from the NIA-AA workgroup. *Alzheimer's & Dementia* 2011;7(3):270-279.
4. Rascovsky K, et al. Sensivity of revised criteria for behavioral variant of frontotemporal dementia. *Brain* 2011;134:2456-2477.
5. Gorno-Tempini MI, et al. Classification of primary progressive aphasia and its variants. *Neurology* 2011;76:1006-1014.
6. McKeith IG, et al. Diagnosis and management of dementia with Lewy bodies: Fourth consensus report of the DLB Consortium. *Neurology* 2017;89(1):88-100.
7. Höglinger GU, et al. Clinical diagnosis of progressive supranuclear palsy: The movement disorder society criteria. *Movement disorders* 2017;32(6):853-864.
8. Armstrong MJ, et al. Criteria for the diagnosis of corticobasal degeneration. *Neurology* 2013;80(5):496-503.
9. Postuma RB, et al. The new definition and diagnostic criteria of Parkinson's disease. *Lancet Neurology* 2016;15(6):546-548.
10. Roman GS, et al. "Vascular dementia" Diagnostic criteria for research studies. Report of the NINDS-AIREN International Workshop. *Neurology* 1993;43(2):250-260.

**eTable 2.** Methods to determine A $\beta$ -positivity across centers

| Cohort                   | Modality                           | Methodology                                                                                                                                | Cut-off    |
|--------------------------|------------------------------------|--------------------------------------------------------------------------------------------------------------------------------------------|------------|
| Seoul <sup>1</sup>       | [ <sup>18</sup> F]Florbetaben PET  | Neocortical SUVR for the 90-110min interval p.i. with cerebellar reference region                                                          | >1.4 SUVR  |
| BioFINDER <sup>2,3</sup> | [ <sup>18</sup> F]Flutemetamol PET | Global neocortical composite SUVR for the 90-110min interval p.i. with cerebellar cortex, pons and eroded white matter as reference region | >0.69 SUVR |
|                          | CSF A $\beta$ 42                   | ELISA (INNOTEST)                                                                                                                           | <650 ng/L  |
| UCSF <sup>4,5</sup>      | [ <sup>11</sup> C]PIB PET          | Global neocortical composite SUVR for the 60-90min interval p.i. with cerebellar GM as reference tissue.                                   | >1.21 SUVR |
|                          | CSF A $\beta$ 42                   | INNO-BIA AlzBio3                                                                                                                           | <250 ng/L  |

Note that several studies<sup>6-10</sup> have shown high (~90%) concordance between PET and CSF for determining A $\beta$ -positivity.

#### References:

1. Villemagne VL, et al. Amyloid imaging with (18)F-florbetaben in Alzheimer disease and other dementias. *J Nucl Med* 2011;52:1210–1217.
2. Mattsson N, et al. Comparing 18F-AV-1451 with CSF t-tau and p-tau for diagnosis of Alzheimer disease. *Neurology* 2018;90(5):e388-e395.
3. Mattson N, et al. Increased amyloidogenic APP processing in APOE e4-negative individuals with cerebral  $\beta$ -amyloidosis. *Nature Commun* 2016;7:10918.
4. Ossenkoppele R et al. Tau PET patterns mirror clinical and neuroanatomical variability in Alzheimer's disease. *Brain* 2016;139(5):1551-1567.
5. Shaw L, et al. Cerebrospinal fluid biomarker signature in Alzheimer's disease neuroimaging initiative subjects. *Annals of Neurology* 2009;65(4):403-413.
6. Landau, S. M. *et al.* Comparing positron emission tomography imaging and cerebrospinal fluid measurements of  $\beta$ -amyloid. *Ann Neurol* 2013;74(826–836).
7. Fagan, A. M. et al. Cerebrospinal fluid tau and ptau181 increase with cortical amyloid deposition in cognitively normal individuals: Implications for future clinical trials of Alzheimer's disease. *EMBO Mol. Med* 2009;1(371–380).
8. Palmqvist S et al. Accuracy of brain amyloid detection in clinical practice using cerebrospinal fluid amyloid-beta 42: A cross-validation study against amyloid PET. *JAMA Neurology* 2014;71(10):1282-1289.
9. Leuzy A. et al. Pittsburgh compound B imaging and cerebrospinal fluid amyloid-beta in a multicenter European memory clinic study. *Brain* 2016;139:2540-2553.
10. Zwan, M. et al. Concordance between cerebrospinal fluid biomarkers and [<sup>11</sup>C]PIB PET in a memory clinic cohort. *J. Alzheimers. Dis.* 2014;41(801–807).

### eTable 3. PET and MRI protocols

|                                                                                                                                                                                                                                                                                                                                                                                                                                                                                                                |
|----------------------------------------------------------------------------------------------------------------------------------------------------------------------------------------------------------------------------------------------------------------------------------------------------------------------------------------------------------------------------------------------------------------------------------------------------------------------------------------------------------------|
| <p><b>PET acquisition:</b> A Biograph mCT PET/CT scanner (Siemens Medical Solutions) in Seoul, Discovery 690 PET scanner (GE medical systems) in BioFINDER, a Biograph 6 Truepoint PET/CT scanner (Siemens Medical Solutions) at Lawrence Berkeley National Laboratory for UCSF patients, and a Discovery VCT PET/CT scanner (GE medical systems) at UCSF China Bassin for UCSF controls, following a bolus injection of ~370 MBq (BioFINDER and UCSF) or ~280MBq (Seoul) of [<sup>18</sup>F]flortaucipir.</p> |
| <p><b>MRI acquisition:</b> Images were acquired on a 3.0T Discovery MR750 scanner (GE medical systems) in Seoul, 3.0T Tim Trio or Skyra scanner (Siemens Medical Solutions) in BioFINDER and a 3.0T Tim Trio or Prisma scanner (Siemens Medical Solutions) at UCSF.</p>                                                                                                                                                                                                                                        |
| <p><b>Voxelwise analyses (Fig. 2+3):</b> [<sup>18</sup>F]flortaucipir images were warped into MNI standard space using the non-linear transformation calculated by normalizing the T1-weighted MR image to the MNI152 1x1x1 mm<sup>3</sup> template with Advanced Normalization Tools (ANTs). Prior to voxelwise analyses, images were smoothed with an 8mm FWHM Gaussian kernel.</p>                                                                                                                          |
| <p><b>MRI processing (Fig. 3, eTable 15):</b> Cortical reconstruction and volumetric segmentation were performed with the FreeSurfer image analyses pipeline v6.0. T1-weighted images underwent correction for intensity homogeneity, removal of non-brain tissue and segmentation into gray matter and white matter. Reconstructed datasets were visually inspected for accuracy, and segmentation errors were corrected.</p>                                                                                 |

**eTable 4.** Youden index to derive [<sup>18</sup>F]flortaucipir cut-offs

| <b>ROC analysis in BioFINDER data (52 AD patients vs 66 controls)</b>      |                |                   |                    |                    |
|----------------------------------------------------------------------------|----------------|-------------------|--------------------|--------------------|
|                                                                            | <i>Cut-off</i> | <i>Youden's J</i> | <i>Sensitivity</i> | <i>Specificity</i> |
| Entorhinal cortex                                                          | 1.2572         | 0.76              | 92.3               | 83.3               |
| Inferior temporal cortex                                                   | 1.3512         | 0.90              | 96.2               | 93.9               |
| Temporal Meta-ROI                                                          | 1.2677         | 0.88              | 98.1               | 89.4               |
| Temporoparietal cortex                                                     | 1.2081         | 0.87              | 94.2               | 92.4               |
| Braak V/VI                                                                 | 1.2685         | 0.89              | 98.1               | 90.9               |
| <b>ROC analysis in Seoul data (55 AD dementia patients vs 90 controls)</b> |                |                   |                    |                    |
|                                                                            | <i>Cut-off</i> | <i>Youden's J</i> | <i>Sensitivity</i> | <i>Specificity</i> |
| Entorhinal cortex                                                          | 1.4125         | 0.85              | 90.0               | 94.4               |
| Inferior temporal cortex                                                   | 1.2936         | 0.82              | 85.5               | 96.7               |
| Temporal Meta-ROI                                                          | 1.2743         | 0.83              | 87.3               | 95.6               |
| Temporoparietal cortex                                                     | 1.2667         | 0.78              | 80.0               | 97.8               |
| Braak V/VI                                                                 | 1.2052         | 0.68              | 78.2               | 90.0               |

**eTable 5.** Subject characteristics by diagnostic group

|                                          | MCI-due-to-AD<br>(n=83) | bvFTD<br>(n=33) | nfvPPA<br>(n=17) | svPPA<br>(n=11) | DLB<br>(n=24)   | PSP<br>(n=40)  | CBS<br>(n=23)  | PD<br>MCI/dementia<br>(n=70) | PD<br>Cog.<br>Normal<br>(n=23) | VaD<br>(n=7)  |
|------------------------------------------|-------------------------|-----------------|------------------|-----------------|-----------------|----------------|----------------|------------------------------|--------------------------------|---------------|
| Age                                      | 70.1 (9.3)              | 64.8 (9.8)      | 66.8 (8.7)       | 66.9 (7.9)      | 72.7 (7.8)      | 69.9 (6.6)     | 69.1 (6.3)     | 69.4 (7.0)                   | 67.3 (5.8)                     | 78.6 (7.3)    |
| Age, range                               | 40-89                   | 37-86           | 56-85            | 59-85           | 52-84           | 57-85          | 59-80          | 55-87                        | 56-76                          | 70-89         |
| Sex, % male                              | 51.8                    | 63.6            | 29.4             | 63.6            | 58.3            | 67.5           | 52.0           | 52.9                         | 65.2                           | 42.9          |
| Education                                | 12.9 (4.6)              | 14.6 (4.9)      | 14.0 (4.5)       | 13.7 (5.2)      | 9.4 (4.0)       | 14.9 (5.0)     | 12.7 (4.8)     | 13.2 (5.3)                   | 11.2 (3.5)                     | 7.4 (8.3)     |
| MMSE                                     | 25.7 (3.1)              | 22.8 (6.6)      | 26.5 (2.7)       | 23.2 (5.7)      | 20.2 (6.4)      | 24.7 (5.1)     | 26.1 (4.4)     | 21.7 (7.0)                   | 27.6 (1.9)                     | 18.9 (5.1)    |
| CDR                                      | 0.5 (0.3)               | 1.1 (0.5)       | 0.5 (0.7)        | 0.8 (0.5)       | 1.1 (0.8)       | 0.7 (0.4)      | 0.4 (0.5)      | 0.6 (0.6)                    | 0.1 (0.2)                      | 1.0 (0.5)     |
| Amyloid- $\beta$<br>positivity, %        | 100<br>(83/83)          | 13.3<br>(4/30)  | 11.8<br>(2/17)   | 36.4<br>(4/11)  | 59.1<br>(13/22) | 24.3<br>(9/37) | 13.0<br>(3/23) | 35.9<br>(14/39)              | 9.5<br>(2/21)                  | 14.3<br>(1/7) |
| APOE $\epsilon$ 4<br>positivity, %       | 56.9<br>(41/79)         | 8.3<br>(2/24)   | 33.3<br>(3/9)    | 20.0<br>(2/10)  | 47.6<br>(10/21) | 24.0<br>(6/25) | 46.2<br>(6/13) | 45.0<br>(9/20)               | 16.7<br>(2/12)                 | 42.9<br>(3/7) |
| Cohort (n, Seoul/<br>BioFINDER/<br>UCSF) | 40/28/15                | 6/6/21          | 1/3/13           | 4/5/2           | 18/6/0          | 13/12/15       | 6/10/9         | 22/18/30                     | 12/11/0                        | 4/3/0         |
| <b>[<sup>18</sup>F]flortaucipir SUVR</b> |                         |                 |                  |                 |                 |                |                |                              |                                |               |
| Entorhinal<br>cortex                     | 1.58 (0.38)             | 1.20 (0.18)     | 1.16 (0.14)      | 1.33 (0.32)     | 1.37 (0.32)     | 1.12 (0.15)    | 1.09 (0.12)    | 1.18 (0.16)                  | 1.09 (0.08)                    | 1.28 (0.28)   |
| Inferior temporal<br>cortex              | 1.60 (0.46)             | 1.25 (0.14)     | 1.21 (0.10)      | 1.62 (0.52)     | 1.33 (0.28)     | 1.17(0.07)     | 1.18 (0.08)    | 1.21 (0.18)                  | 1.14 (0.06)                    | 1.29 (0.27)   |
| Temporal<br>meta-ROI                     | 1.54 (0.37)             | 1.20 (0.10)     | 1.18 (0.09)      | 1.50 (0.45)     | 1.33 (0.27)     | 1.15(0.08)     | 1.14 (0.06)    | 1.20 (0.18)                  | 1.13 (0.06)                    | 1.26 (0.28)   |
| Temporoparietal<br>cortex                | 1.44 (0.38)             | 1.13 (0.08)     | 1.14 (0.07)      | 1.40 (0.48)     | 1.26 (0.26)     | 1.10 (0.07)    | 1.10 (0.06)    | 1.15 (0.15)                  | 1.09 (0.07)                    | 1.21 (0.29)   |
| Braak stage V/VI                         | 1.38 (0.36)             | 1.11 (0.11)     | 1.12 (0.10)      | 1.35 (0.39)     | 1.25 (0.26)     | 1.10 (0.06)    | 1.10 (0.06)    | 1.14 (0.12)                  | 1.11 (0.06)                    | 1.21 (0.22)   |

MCI, Mild cognitive impairment; AD, Alzheimer's Disease; bvFTD = Behavioral variant of frontotemporal dementia; nfvPPA = Non-fluent variant of primary progressive aphasia; svPPA = Semantic variant of primary progressive aphasia; DLB = Dementia with Lewy bodies; PSP = Progressive supranuclear palsy; CBS = Corticobasal syndrome; PD = Parkinson's disease; NC = Normal cognition; Dem = Dementia; VaD = Vascular dementia.

**eTable 6.** Subject characteristics for each center

|                                          | Cognitively normal |                   |             | Mild cognitive impairment due to AD |                   |              | AD dementia  |                   |              | Non-AD disorders |                   |             |
|------------------------------------------|--------------------|-------------------|-------------|-------------------------------------|-------------------|--------------|--------------|-------------------|--------------|------------------|-------------------|-------------|
|                                          | Seoul (n=90)       | BioFINDE R (n=66) | UCSF (n=4)  | Seoul (n=64)                        | BioFINDE R (n=29) | UCSF (n=33)  | Seoul (n=55) | BioFINDE R (n=52) | UCSF (n=72)  | Seoul (n=89)     | BioFINDE R (n=73) | UCSF (n=92) |
| Age                                      | 65.9 (9.5)         | 74.0 (6.9)        | 57.8 (11.0) | 70.5 (9.4)                          | 71.5 (9.2)        | 62.7 (11.0)  | 73.2 (9.5)   | 70.9 (8.2)        | 64.0 (8.5)   | 70.9 (7.5)       | 70.6 (6.9)        | 65.2 (7.9)  |
| Age, range                               | 41-90              | 52-88             | 44-70       | 49-89                               | 40-88             | 32-88        | 47-91        | 44-84             | 48-83        | 52-89            | 56-87             | 37-80       |
| Sex (% male)                             | 35.6               | 45.5              | 75.0        | 40.6                                | 65.5              | 57.6         | 21.8         | 55.8              | 44.4         | 57.3             | 61.6              | 54.3        |
| Education                                | 12.1 (4.4)         | 12.2 (3.6)        | 19.0 (1.7)  | 11.6 (4.5)                          | 12.5 (3.4)        | 17.5 (3.2)   | 10.1 (5.6)   | 12.4 (3.6)        | 16.8 (3.0)   | 9.8 (5.2)        | 12.3 (4.1)        | 17.1 (3.4)  |
| MMSE                                     | 28.2 (1.8)         | 29.0 (1.1)        | 28.8 (1.5)  | 25.8 (2.9)                          | 25.8 (2.9)        | 27.1 (2.6)   | 18.7 (5.3)   | 21.4 (5.2)        | 20.7 (5.7)   | 23.1 (5.9)       | 24.2 (5.7)        | 23.8 (6.6)  |
| CDR                                      | 0 (0.0)            | 0.1 (0.2)         | 0.2 (0.3)   | 0.5 (0.0)                           | 0.6 (0.5)         | 0.5 (0.2)    | 1.1 (0.6)    | 1.2 (0.7)         | 0.8 (0.3)    | 0.7 (0.6)        | 0.8 (0.6)         | 0.5 (0.5)   |
| Amyloid-β+, %                            | 11.1 (10/90)       | 47.0 (31/66)      | 25.0 (1/4)  | 62.5 (40/64)                        | 96.6 (28/29)      | 45.5 (15/33) | 100 (55/55)  | 100 (52/52)       | 100 (72/72)  | 22.5 (20/89)     | 35.0 (21/60)      | 14.8 (9/61) |
| APOE ε4+, %                              | 18.9 (17/90)       | 48.4 (30/62)      | 50.0 (2/4)  | 35.9 (23/64)                        | 75.0 (18/24)      | 25.0 (5/20)  | 50.0 (27/54) | 63.6 (28/44)      | 56.9 (33/58) | 30.8 (24/78)     | 38.5 (10/26)      | 23.1 (9/39) |
| <b>[<sup>18</sup>F]flortaucipir SUVR</b> |                    |                   |             |                                     |                   |              |              |                   |              |                  |                   |             |
| Entorhinal                               | 1.19(0.13)         | 1.13(0.18)        | 1.13(0.06)  | 1.50(0.40)                          | 1.44(0.29)        | 1.40(0.37)   | 1.86(0.33)   | 1.59(0.25)        | 1.74(0.30)   | 1.27(0.25)       | 1.09(0.17)        | 1.16(0.13)  |
| Inf. temporal                            | 1.15(0.08)         | 1.21(0.11)        | 1.14(0.06)  | 1.34(0.27)                          | 1.72(0.57)        | 1.45(0.42)   | 1.90(0.58)   | 2.06(0.50)        | 2.25(0.55)   | 1.26(0.28)       | 1.23(0.20)        | 1.20(0.10)  |
| Temporal meta-ROI                        | 1.16(0.08)         | 1.18(0.10)        | 1.15(0.04)  | 1.34(0.27)                          | 1.61(0.44)        | 1.40(0.36)   | 1.84(0.50)   | 1.90(0.42)        | 2.09(0.46)   | 1.25(0.26)       | 1.17(0.17)        | 1.17(0.08)  |
| Temporoparietal cortex                   | 1.11(0.08)         | 1.12(0.09)        | 1.10(0.03)  | 1.25(0.22)                          | 1.50(0.45)        | 1.36(0.38)   | 1.67(0.48)   | 1.80(0.47)        | 2.12(0.52)   | 1.20(0.25)       | 1.13(0.16)        | 1.12(0.07)  |
| Braak stage V/VI                         | 1.12(0.08)         | 1.18(0.10)        | 1.08(0.05)  | 1.19(0.14)                          | 1.62(0.46)        | 1.20(0.24)   | 1.46(0.33)   | 1.91(0.44)        | 1.75(0.37)   | 1.17(0.19)       | 1.18(0.17)        | 1.08(0.07)  |



**eTable 7.** Diagnostic performance of partial volume corrected [<sup>18</sup>F]flortaucipir PET in distinguishing AD dementia from non-AD neurodegenerative disorders

| Region-of-interest<br>(threshold)        | Threshold approach: mean+2*SD in all controls |             |             |             |            |             |
|------------------------------------------|-----------------------------------------------|-------------|-------------|-------------|------------|-------------|
|                                          | AUC                                           | Accuracy    | Sensitivity | Specificity | +LR        | -LR         |
| Entorhinal cortex<br>(SUVR: 1.82)        | 0.92                                          | 84.3        | 78.8        | 88.2        | 6.7        | 0.24        |
|                                          | [0.89-0.95]                                   | [80.5-87.6] | [72.1-84.5] | [83.6-91.9] | [4.7-9.4]  | [0.18-0.32] |
| Inferior temporal cortex<br>(SUVR: 1.59) | 0.94                                          | 88.2        | 89.9        | 87.0        | 6.9        | 0.12        |
|                                          | [0.92-0.97]                                   | [84.8-91.1] | [84.6-93.9] | [82.2-90.9] | [5.0-9.6]  | [0.07-0.18] |
| Temporal Meta-ROI<br>(SUVR: 1.51)        | 0.95                                          | 89.6        | 91.1        | 88.6        | 8.0        | 0.10        |
|                                          | [0.93-0.97]                                   | [86.3-92.3] | [85.9-94.8] | [84.0-92.2] | [5.7-11.3] | [0.06-0.16] |
| Temporoparietal cortex<br>(SUVR: 1.49)   | 0.94                                          | 90.5        | 88.3        | 92.1        | 11.2       | 0.13        |
|                                          | [0.91-0.96]                                   | [87.4-93.1] | [82.6-92.6] | [88.1-95.1] | [7.3-17.1] | [0.09-0.19] |
| Braak stage V/VI<br>(SUVR: 1.52)         | 0.93                                          | 88.9        | 83.2        | 92.9        | 11.8       | 0.18        |
|                                          | [0.90-0.95]                                   | [85.6-91.7] | [77.0-88.4] | [89.0-95.8] | [7.5-18.4] | [0.13-0.25] |

**eTable 8.** Diagnostic performance of [<sup>18</sup>F]flortaucipir using a cut-off derived in AD dementia vs non-AD neurodegenerative disorders

| <b>Region-of-interest<br/>(threshold, Youden's <i>J</i><br/>in Seoul cohort)</b>     | <b>A. Threshold approach: Youden Index derived in Seoul cohort<br/>(55 AD dementia vs 89 non-AD diseases) applied to BioFINDER &amp; UCSF cohorts</b> |                     |                     |                      |                     |
|--------------------------------------------------------------------------------------|-------------------------------------------------------------------------------------------------------------------------------------------------------|---------------------|---------------------|----------------------|---------------------|
| N=289                                                                                | Accuracy                                                                                                                                              | Sensitivity         | Specificity         | +LR                  | -LR                 |
| Entorhinal cortex<br>(SUVR: 1.45, <i>J</i> : 0.68)                                   | 90.3<br>[86.3-93.5]                                                                                                                                   | 79.8<br>[71.7-86.5] | 98.2<br>[94.8-99.6] | 43.9<br>[14.3-135.2] | 0.21<br>[0.14-0.29] |
| Inferior temporal cortex<br>(SUVR: 1.36, <i>J</i> : 0.68)                            | 93.1<br>[89.5-95.7]                                                                                                                                   | 95.2<br>[89.8-98.2] | 91.5<br>[86.2-95.3] | 11.2<br>[6.8-18.5]   | 0.05<br>[0.02-0.12] |
| Temporal Meta-ROI<br>(SUVR: 1.36, <i>J</i> : 0.69)                                   | 93.9<br>[90.1-96.5]                                                                                                                                   | 92.7<br>[86.7-96.6] | 95.0<br>[89.5-98.2] | 18.7<br>[8.6-40.9]   | 0.08<br>[0.04-0.14] |
| Temporoparietal cortex<br>(SUVR: 1.26, <i>J</i> : 0.68)                              | 93.4<br>[89.9-96.0]                                                                                                                                   | 90.3<br>[83.7-94.9] | 95.8<br>[91.5-98.3] | 21.3<br>[10.3-44.1]  | 0.10<br>[0.06-0.17] |
| Braak stage V/VI<br>(SUVR: 1.23, <i>J</i> : 0.59)                                    | 91.7<br>[87.9-94.6]                                                                                                                                   | 92.7<br>[86.7-96.6] | 90.9<br>[85.5-94.8] | 10.2<br>[6.3-16.6]   | 0.08<br>[0.04-0.15] |
| <b>Region-of-interest<br/>(threshold, Youden's <i>J</i><br/>in BioFINDER cohort)</b> | <b>B. Threshold approach: Youden Index derived in BioFINDER cohort (52 AD<br/>dementia vs 73 non-AD diseases) applied to Seoul &amp; UCSF cohorts</b> |                     |                     |                      |                     |
| N=308                                                                                | Accuracy                                                                                                                                              | Sensitivity         | Specificity         | +LR                  | -LR                 |
| Entorhinal cortex<br>(SUVR: 1.34, <i>J</i> : 0.72)                                   | 88.0<br>[83.8-91.4]                                                                                                                                   | 92.9<br>[87.0-96.7] | 84.5<br>[78.4-89.5] | 6.0<br>[4.3-8.5]     | 0.08<br>[0.04-0.16] |
| Inferior temporal cortex<br>(SUVR: 1.38, <i>J</i> : 0.85)                            | 89.6<br>[85.7-92.8]                                                                                                                                   | 88.2<br>[81.3-93.2] | 90.6<br>[85.4-94.4] | 9.4<br>[6.0-14.8]    | 0.13<br>[0.08-0.21] |
| Temporal Meta-ROI<br>(SUVR: 1.35, <i>J</i> : 0.84)                                   | 89.6<br>[85.7-92.8]                                                                                                                                   | 89.0<br>[82.2-93.8] | 90.1<br>[84.7-94.0] | 9.0<br>[5.8-13.9]    | 0.12<br>[0.07-0.20] |
| Temporoparietal cortex<br>(SUVR: 1.22, <i>J</i> : 0.83)                              | 87.7<br>[83.5-91.1]                                                                                                                                   | 89.0<br>[82.2-93.8] | 86.7<br>[80.9-91.3] | 6.7<br>[4.6-9.8]     | 0.13<br>[0.08-0.21] |
| Braak stage V/VI<br>(SUVR: 1.28, <i>J</i> : 0.83)                                    | 87.3<br>[83.1-90.8]                                                                                                                                   | 76.4<br>[68.0-83.5] | 95.0<br>[90.8-97.7] | 15.4<br>[8.1-29.3]   | 0.25<br>[0.18-0.34] |

**eTable 9.** Diagnostic performance of [<sup>18</sup>F]flortaucipir PET using the closest cut-off at 95% sensitivity in AD dementia vs controls

| <b>Region-of-interest (threshold, SENS/SPEC in Seoul cohort)</b>     | <b>A. Threshold approach: Closest cut-off to 95% sensitivity derived in Seoul cohort (55 AD dementia vs 90 controls) applied to BioFINDER &amp; UCSF cohorts</b> |                      |                     |                     |                     |
|----------------------------------------------------------------------|------------------------------------------------------------------------------------------------------------------------------------------------------------------|----------------------|---------------------|---------------------|---------------------|
| N=289                                                                | Accuracy                                                                                                                                                         | Sensitivity          | Specificity         | +LR                 | -LR                 |
| Entorhinal cortex<br>(SUVR: 1.36; 94.5%/90.0%)                       | 89.6<br>[85.5-92.9]                                                                                                                                              | 85.5<br>[78.0-91.2]  | 92.7<br>[87.6-96.2] | 11.8<br>[6.8-20.4]  | 0.16<br>[0.10-0.24] |
| Inferior temporal cortex<br>(SUVR: 1.18; 94.5%/64.6%)                | 68.2<br>[62.5-73.5]                                                                                                                                              | 99.2<br>[95.6-100.0] | 44.9<br>[37.1-52.8] | 1.8<br>[1.6-2.1]    | 0.02<br>[0.00-0.13] |
| Temporal Meta-ROI<br>(SUVR: 1.18; 94.5%/67.8%)                       | 94.8<br>[91.6-97.1]                                                                                                                                              | 92.7<br>[86.7-96.6]  | 96.4<br>[92.3-98.7] | 25.5<br>[11.6-56.0] | 0.08<br>[0.04-0.14] |
| Temporoparietal cortex<br>(SUVR: 1.10; 94.5%/52.2%)                  | 65.4<br>[59.6-70.9]                                                                                                                                              | 98.4<br>[94.3-99.8]  | 40.6<br>[33.0-48.5] | 1.7<br>[1.5-1.9]    | 0.04<br>[0.01-0.16] |
| Braak stage V/VI<br>(SUVR: 1.06; 94.5%/20.0%)                        | 55.4<br>[49.4-61.2]                                                                                                                                              | 98.4<br>[94.3-99.8]  | 23.0<br>[16.8-30.2] | 1.3<br>[1.2-1.4]    | 0.07<br>[0.02-0.28] |
| <b>Region-of-interest (threshold, SENS/SPEC in BioFINDER cohort)</b> | <b>B. Threshold approach: Closest cut-off to 95% sensitivity derived in BioFINDER cohort (52 AD dementia vs 66 controls) applied to Seoul &amp; UCSF cohorts</b> |                      |                     |                     |                     |
| N=308                                                                | Accuracy                                                                                                                                                         | Sensitivity          | Specificity         | +LR                 | -LR                 |
| Entorhinal cortex<br>(SUVR: 1.16; 96.2%/69.7%)                       | 67.5<br>[62.0-72.7]                                                                                                                                              | 98.4<br>[94.4-99.8]  | 45.9<br>[38.4-53.4] | 1.8<br>[1.6-2.1]    | 0.03<br>[0.01-0.14] |
| Inferior temporal cortex<br>(SUVR: 1.35; 96.2%/93.9%)                | 89.6<br>[85.7-92.8]                                                                                                                                              | 88.2<br>[81.3-93.2]  | 90.6<br>[85.4-94.4] | 9.4<br>[6.0-14.8]   | 0.13<br>[0.08-0.21] |
| Temporal Meta-ROI<br>(SUVR: 1.28; 96.2%/89.4%)                       | 89.6<br>[85.7-92.8]                                                                                                                                              | 89.0<br>[82.2-93.8]  | 90.1<br>[84.7-94.0] | 9.0<br>[5.8-13.9]   | 0.12<br>[0.07-0.20] |
| Temporoparietal cortex<br>(SUVR: 1.17; 96.2%/80.3%)                  | 77.6<br>[72.5-82.1]                                                                                                                                              | 92.1<br>[86.0-96.2]  | 67.4<br>[60.1-74.2] | 2.8<br>[2.3-3.5]    | 0.12<br>[0.06-0.21] |
| Braak stage V/VI<br>(SUVR: 1.28; 96.2%/90.9%)                        | 87.7<br>[83.5-91.1]                                                                                                                                              | 77.2<br>[68.9-84.1]  | 95.0<br>[90.8-97.7] | 15.5<br>[8.2-29.6]  | 0.24<br>[0.17-0.33] |

**eTable 10.** Diagnostic performance of [<sup>18</sup>F]flortaucipir PET using the closest cut-off at 95% specificity in AD dementia vs controls

| <b>Region-of-interest<br/>(threshold, SENS/SPEC in<br/>Seoul cohort)</b>     | <b>A. Threshold approach: Closest cut-off to 95% specificity derived in Seoul cohort<br/>(55 AD dementia vs 90 controls) applied to BioFINDER &amp; UCSF cohorts</b> |                     |                     |                      |                     |
|------------------------------------------------------------------------------|----------------------------------------------------------------------------------------------------------------------------------------------------------------------|---------------------|---------------------|----------------------|---------------------|
| N=289                                                                        | Accuracy                                                                                                                                                             | Sensitivity         | Specificity         | +LR                  | -LR                 |
| Entorhinal cortex<br>(SUVR: 1.46;<br>85.5%/95.6%)                            | 90.3<br>[86.3-93.5]                                                                                                                                                  | 79.8<br>[71.7-86.5] | 98.2<br>[94.8-99.6] | 43.9<br>[14.3-135.2] | 0.21<br>[0.14-0.29] |
| Inferior temporal cortex<br>(SUVR: 1.28;<br>85.5%/95.6%)                     | 88.6<br>[84.3-92.0]                                                                                                                                                  | 97.6<br>[93.1-99.5] | 81.8<br>[75.1-87.4] | 5.4<br>[3.9-7.4]     | 0.03<br>[0.01-0.09] |
| Temporal Meta-ROI<br>(SUVR: 1.27;<br>87.3%/95.6%)                            | 91.7<br>[87.9-94.6]                                                                                                                                                  | 96.8<br>[92.0-99.1] | 87.9<br>[81.9-92.4] | 8.0<br>[5.3-12.1]    | 0.04<br>[0.01-0.10] |
| Temporoparietal cortex<br>(SUVR: 1.25;<br>80.0%/95.6%)                       | 93.4<br>[89.9-96.0]                                                                                                                                                  | 91.9<br>[85.7-96.1] | 94.6<br>[89.9-97.5] | 16.9<br>[8.9-31.9]   | 0.09<br>[0.05-0.15] |
| Braak stage V/VI<br>(SUVR: 1.26;<br>70.9%/95.6%)                             | 92.7<br>[89.1-95.5]                                                                                                                                                  | 91.9<br>[85.7-96.1] | 93.3<br>[88.4-96.6] | 13.8<br>[7.8-24.5]   | 0.09<br>[0.05-0.16] |
| <b>Region-of-interest<br/>(threshold, SENS/SPEC in<br/>BioFINDER cohort)</b> | <b>B. Threshold approach: Closest cut-off to 95% specificity derived in BioFINDER cohort<br/>(52 AD dementia vs 66 controls) applied to Seoul &amp; UCSF cohorts</b> |                     |                     |                      |                     |
| N=308                                                                        | Accuracy                                                                                                                                                             | Sensitivity         | Specificity         | +LR                  | -LR                 |
| Entorhinal cortex<br>(SUVR: 1.53;<br>57.7%/95.5%)                            | 86.4<br>[82.0-90.0]                                                                                                                                                  | 78.0<br>[69.7-84.8] | 92.3<br>[87.4-95.7] | 10.1<br>[6.0-16.8]   | 0.24<br>[0.17-0.33] |
| Inferior temporal cortex<br>(SUVR: 1.40;<br>90.4%/95.5%)                     | 89.6<br>[85.7-92.8]                                                                                                                                                  | 85.8<br>[78.5-91.4] | 92.3<br>[87.4-95.7] | 11.1<br>[6.7-18.4]   | 0.15<br>[0.10-0.24] |

|                                                        |                     |                     |                     |                    |                     |
|--------------------------------------------------------|---------------------|---------------------|---------------------|--------------------|---------------------|
| Temporal Meta-ROI<br>(SUVR: 1.37;<br>90.4%/95.5%)      | 90.6<br>[86.8-93.6] | 87.4<br>[80.4-92.6] | 92.9<br>[88.0-96.1] | 12.2<br>[7.2-20.6] | 0.14<br>[0.09-0.21] |
| Temporoparietal cortex<br>(SUVR: 1.32;<br>82.7%/95.5%) | 89.9<br>[86.0-93.1] | 82.7<br>[75.0-88.8] | 95.0<br>[90.8-97.7] | 16.6<br>[8.8-31.6] | 0.18<br>[0.12-0.27] |
| Braak stage V/VI<br>(SUVR: 1.36;<br>90.4%/95.5%)       | 85.7<br>[81.3-89.4] | 70.9<br>[62.2-78.6] | 96.1<br>[92.2-98.4] | 18.3<br>[8.8-38.2] | 0.30<br>[0.23-0.40] |

**eTable 11.** Diagnostic accuracy in AD dementia (n=179) vs non-AD neurodegenerative disorders (n=254) and in combined A $\beta$ + and A $\beta$ - (n=17) AD dementia vs non-AD neurodegenerative disorders

| <b>Region-of-interest</b> | <b>AUC A<math>\beta</math>+ AD dementia (95% CI)</b> | <b>AUC A<math>\beta</math>+ and A<math>\beta</math>- AD dementia (95% CI)</b> | <b>P for difference</b> |
|---------------------------|------------------------------------------------------|-------------------------------------------------------------------------------|-------------------------|
| Entorhinal cortex         | 0.94 (0.91-0.96)                                     | 0.92 (0.89-0.94)                                                              | 0.24                    |
| Inferior temporal cortex  | 0.94 (0.92-0.97)                                     | 0.91 (0.88-0.94)                                                              | 0.08                    |
| Temporal Meta-ROI         | 0.95 (0.93-0.97)                                     | 0.92 (0.90-0.95)                                                              | 0.11                    |
| Temporoparietal cortex    | 0.93 (0.91-0.96)                                     | 0.91 (0.88-0.94)                                                              | 0.21                    |
| Braak stage V/VI          | 0.92 (0.89-0.95)                                     | 0.89 (0.86-0.93)                                                              | 0.28                    |

**eTable 12.** Tau-positivity in the temporal Meta-ROI by amyloid status

| <b>Diagnosis</b>                               | <b>A<math>\beta</math> status</b> | <b>N total</b> | <b>N tau-positive (%)</b> |
|------------------------------------------------|-----------------------------------|----------------|---------------------------|
| Cognitively normal control                     | +                                 | 42             | 5 (11.9%)                 |
|                                                | -                                 | 118            | 2 (1.7%)                  |
| Mild cognitive impairment                      | +                                 | 83             | 51 (61.4%)                |
|                                                | -                                 | 43             | 2 (4.7%)                  |
| Alzheimer dementia                             | +                                 | 179            | 161 (89.9%)               |
| Behavioral variant frontotemporal dementia     | +                                 | 4              | 0 (0%)                    |
|                                                | -                                 | 26             | 1 (3.8%)                  |
|                                                | ?                                 | 3              | 3 (100%)                  |
| Non-fluent variant primary progressive aphasia | +                                 | 2              | 1 (50%)                   |
|                                                | -                                 | 15             | 0 (0%)                    |
| Semantic variant primary progressive aphasia   | +                                 | 4              | 4 (100%)                  |
|                                                | -                                 | 7              | 0 (0%)                    |
| Dementia with Lewy bodies                      | +                                 | 13             | 7 (53.8%)                 |
|                                                | -                                 | 9              | 1 (11.1%)                 |
|                                                | ?                                 | 2              | 0 (0%)                    |
| Progressive supranuclear palsy                 | +                                 | 9              | 0 (0%)                    |
|                                                | -                                 | 28             | 0 (0%)                    |
|                                                | ?                                 | 3              | 0 (0%)                    |
| Corticobasal syndrome                          | +                                 | 1              | 0 (0%)                    |
|                                                | -                                 | 19             | 0 (0%)                    |
|                                                | ?                                 | 3              | 0 (0%)                    |
| Parkinson disease with Cognitive impairment    | +                                 | 14             | 3 (21.4%)                 |
|                                                | -                                 | 25             | 1 (4.0%)                  |
|                                                | ?                                 | 31             | 1 (3.2%)                  |
| Parkinson disease with normal cognition        | +                                 | 2              | 0 (0%)                    |
|                                                | -                                 | 19             | 0 (0%)                    |
|                                                | ?                                 | 2              | 0 (0%)                    |
| Vascular dementia                              | +                                 | 1              | 1 (100%)                  |
|                                                | -                                 | 6              | 1 (16.7%)                 |

**eTable 13.** Factors contributing to tau-negativity in AD dementia and tau-positivity in non-AD diseases in the temporal meta-ROI.

| AD dementia                            |                      |                      |                     |                  |                    |              |
|----------------------------------------|----------------------|----------------------|---------------------|------------------|--------------------|--------------|
|                                        | Tau-negative (n=18)  | Tau-positive (n=161) | OR (95% CI)         | P                |                    |              |
| <b>A. Bivariate model</b>              |                      |                      |                     |                  |                    |              |
| Age (n=179)                            | 76.3 (8.1)           | 68.0 (9.4)           | 0.90 (0.84-0.96)    | <b>0.001</b>     |                    |              |
| Sex, %male (n=179)                     | 44.4                 | 40.4                 | 0.85 (0.32-2.26)    | 0.739            |                    |              |
| APOE ε4, % positive (n=156)            | 38.5                 | 58.0                 | 2.21 (0.69-7.10)    | 0.182            |                    |              |
| MMSE (n=169)                           | 24.1 (4.2)           | 19.8 (5.4)           | 0.81 (0.71-0.93)    | <b>0.002</b>     |                    |              |
|                                        | Tau-negative (n=13)  | Tau-positive (n=138) | OR (95% CI)         | P                | Imputed OR (95%CI) | Imputed P    |
| <b>B. Multivariable model* (n=151)</b> |                      |                      |                     |                  |                    |              |
| Age                                    | 76.8 (9.0)           | 68.6 (5.3)           | 0.89 (0.82-0.97)    | <b>0.006</b>     | 0.88 (0.81-0.95)   | <b>0.001</b> |
| Sex, %male                             | 38.5                 | 38.4                 | 0.96 (0.27-3.42)    | 0.946            | 0.84 (0.27-2.60)   | 0.759        |
| APOE ε4, % positive                    | 38.5                 | 59.4                 | 2.31 (0.65-8.15)    | 0.194            | 2.14 (0.63-7.24)   | 0.221        |
| MMSE                                   | 22.9 (3.9)           | 19.9 (5.3)           | 0.82 (0.69-0.97)    | <b>0.022</b>     | 0.77 (0.65-0.90)   | <b>0.001</b> |
| Non-AD neurodegenerative conditions    |                      |                      |                     |                  |                    |              |
|                                        | Tau-negative (n=230) | Tau-positive (n=24)  | OR (95% CI)         | P                |                    |              |
| <b>A. Bivariate model</b>              |                      |                      |                     |                  |                    |              |
| Age (n=254)                            | 68.1 (7.7)           | 75.1 (7.2)           | 1.14 (1.07-1.21)    | <b>&lt;0.001</b> |                    |              |
| Sex, %male (n=254)                     | 57.8                 | 54.2                 | 0.86 (0.37-2.01)    | 0.730            |                    |              |
| APOE ε4 status, % positive (n=143)     | 28.2                 | 42.1                 | 1.85 (0.69-4.98)    | 0.220            |                    |              |
| Aβ status, % positive (n=210)          | 17.9                 | 80.0                 | 2.08 (1.27-3.41)    | <b>0.004</b>     |                    |              |
| MMSE (n=212)                           | 24.3 (5.7)           | 17.7 (5.9)           | 0.87 (0.82-0.93)    | <b>&lt;0.001</b> |                    |              |
|                                        | Tau-negative (n=118) | Tau-positive (n=15)  | OR (95% CI)         | P                | Imputed OR (95%CI) | Imputed P    |
| <b>B. Multivariable model* (n=133)</b> |                      |                      |                     |                  |                    |              |
| Age                                    | 68.1 (7.8)           | 76.3 (7.6)           | 1.16 (1.03-1.31)    | <b>0.016</b>     | 1.09 (1.01-1.18)   | <b>0.020</b> |
| Sex, %male                             | 60.2                 | 46.7                 | 1.04 (0.22-4.88)    | 0.959            | 1.04 (0.37-2.94)   | 0.949        |
| APOE ε4 status, % positive             | 27.1                 | 46.7                 | 1.10 (0.22-5.55)    | 0.909            | 0.99 (0.21-4.75)   | 0.990        |
| Aβ status, % positive                  | 16.1                 | 86.7                 | 34.58 (4.92-243.19) | <b>&lt;0.001</b> | 8.90 (2.21-35.87)  | <b>0.002</b> |
| MMSE                                   | 24.1 (5.0)           | 17.1 (6.3)           | 0.85 (0.75-0.96)    | <b>0.009</b>     | 0.90 (0.84-0.98)   | <b>0.009</b> |

Reported odds ratios, 95% confidence intervals and p-values were derived from bivariate (A) and multivariable (B) binary logistic regression models. \* The multivariable model only included participants with all four variables available. The multivariable analyses



were also done on imputed data sets, with results shown in the two right-most columns (with N=179 for AD dementia, upper part; and N=254 for non-AD neurodegenerative conditions, lower part).

**eTable 14.** Tau-negativity in the temporal Meta-ROI in AD dementia by age

|                                   | <b>Total N</b> | <b>N Tau PET negative</b> | <b>% Tau PET negative</b> |
|-----------------------------------|----------------|---------------------------|---------------------------|
| <b>Early-onset AD (&lt;65 yr)</b> | 65             | 1                         | 1.5                       |
| <b>Late-onset AD (≥65 yr)</b>     | 114            | 17                        | 14.9                      |
| <b>Age range (years):</b>         |                |                           |                           |
| <b>44-54</b>                      | 13             | 0                         | 0                         |
| <b>55-64</b>                      | 52             | 1                         | 1.9                       |
| <b>65-74</b>                      | 55             | 4                         | 7.3                       |
| <b>75-84</b>                      | 53             | 11                        | 20.8                      |
| <b>85+</b>                        | 6              | 2                         | 33.3                      |

**eTable 15.** Combined assessment of temporal Meta-ROI [<sup>18</sup>F]flortaucipir and MRI measures

| <b>AD DEMENTIA vs NON-AD NEURODEGENERATIVE DISORDERS</b>          |                          |                     |
|-------------------------------------------------------------------|--------------------------|---------------------|
| <b>Measure</b>                                                    | <b>AUC [95%CI]</b>       | <b>P vs FTP-PET</b> |
| FTP-PET: temporal Meta-ROI                                        | <b>0.95 [0.93 -0.97]</b> | <b>NA</b>           |
| MRI: AD-signature cortical thickness                              | 0.75 [0.71-0.80]         | <0.001              |
| MRI: Whole brain cortical thickness                               | 0.71 [0.66-0.76]         | <0.001              |
| MRI: Hippocampal volumes                                          | 0.63 [0.57-0.68]         | <0.001              |
|                                                                   |                          |                     |
| FTP-PET: temporal Meta-ROI + MRI: AD-signature cortical thickness | 0.95 [0.93 -0.97]        | 0.97                |
| FTP-PET: temporal Meta-ROI + MRI: Whole brain cortical thickness  | 0.95 [0.93 -0.97]        | 0.94                |
| FTP-PET: temporal Meta-ROI + MRI: Hippocampal volumes             | 0.95 [0.93 -0.97]        | 0.97                |
| <b>MCI-DUE-TO-AD vs NON-AD NEURODEGENERATIVE DISORDERS</b>        |                          |                     |
| FTP-PET: temporal Meta-ROI                                        | <b>0.82 [0.76-0.88]</b>  | <b>NA</b>           |
| MRI: AD-signature cortical thickness                              | 0.56 [0.49-0.64]         | <0.001              |
| MRI: Whole brain cortical thickness                               | 0.49 [0.41-0.64]         | <0.001              |
| MRI: Hippocampal volumes                                          | 0.59 [0.52-0.66]         | <0.001              |
|                                                                   |                          |                     |
| FTP-PET: temporal Meta-ROI + MRI: AD-signature cortical thickness | 0.81 [0.75-0.87]         | 0.73                |
| FTP-PET: temporal Meta-ROI + MRI: Whole brain cortical thickness  | 0.81 [0.76-0.87]         | 0.83                |
| FTP-PET: temporal Meta-ROI + MRI: Hippocampal volumes             | 0.82 [0.76-0.88]         | 0.99                |

**eTable 16.** Specificity for [<sup>18</sup>F]flortaucipir in AD dementia versus non-AD disorders and controls

|                           | <b>AD dementia vs non-AD neurodegenerative disorders</b> |                                                           |                         |
|---------------------------|----------------------------------------------------------|-----------------------------------------------------------|-------------------------|
| <b>Region-of-interest</b> | <b>Specificity % (95%CI)</b>                             | <b>Difference vs A<math>\beta</math> status % (95%CI)</b> | <b>P for difference</b> |
| Temporal Meta-ROI         | 90.4 (86.2-94.3)                                         | 14.3 (9.0-19.5)                                           | <0.001                  |
| Entorhinal cortex         | 91.5 (87.6-95.2)                                         | 15.3 (10.0-21.0)                                          | <0.001                  |
| Inferior temporal cortex  | 90.0 (86.2-93.8)                                         | 13.8 (8.6-19.0)                                           | <0.001                  |
| Temporoparietal cortex    | 92.8 (89.4-96.2)                                         | 16.7 (11.4-21.9)                                          | <0.001                  |
| Braak V-VI                | 93.8 (90.5-97.1)                                         | 17.7 (12.4-22.9)                                          | <0.001                  |
|                           | <b>AD dementia vs controls</b>                           |                                                           |                         |
| <b>Region-of-interest</b> | <b>Specificity % (95%CI)</b>                             | <b>Difference vs A<math>\beta</math> status % (95%CI)</b> | <b>P for difference</b> |
| Temporal Meta-ROI         | 95.6 (91.9-98.8)                                         | 21.8 (15.0-28.1)                                          | <0.001                  |
| Entorhinal cortex         | 95.0 (90.6-98.1)                                         | 21.1 (14.4-27.5)                                          | <0.001                  |
| Inferior temporal cortex  | 96.9 (93.8-99.4)                                         | 23.0 (16.2-30.0)                                          | <0.001                  |
| Temporoparietal cortex    | 96.2 (93.1-98.8)                                         | 22.4 (15.6-29.4)                                          | <0.001                  |
| Braak V-VI                | 95.6 (91.9-98.8)                                         | 21.8 (15.0-28.1)                                          | <0.001                  |

**eTable 17.** Specificity for [<sup>18</sup>F]flortaucipir in AD dementia versus non-AD disorders and controls in younger and older patient groups

| Region-of-interest                                 | AD dementia vs non-AD neurodegenerative disorders |                                              |                                         |
|----------------------------------------------------|---------------------------------------------------|----------------------------------------------|-----------------------------------------|
|                                                    | Specificity<br>% (95%CI)                          | Difference vs A $\beta$ status<br>% (95% CI) | P for difference<br>vs A $\beta$ status |
| <b>Younger patients (&lt;69 years):</b>            |                                                   |                                              |                                         |
| Temporal Meta-ROI                                  | 96.3 (92.2-99.0)                                  | 10.8 (4.9-17.5)                              | <0.001                                  |
| Entorhinal cortex                                  | 97.2 (93.2-100.0)                                 | 11.8 (4.9-19.4)                              | <0.001                                  |
| Inferior temporal cortex                           | 94.1 (89.3-98.1)                                  | 8.7 (1.9-16.5)                               | <0.001                                  |
| Temporoparietal cortex                             | 97.1 (93.2-100.0)                                 | 11.7 (5.8-18.4)                              | <0.001                                  |
| Braak V-VI                                         | 97.1 (93.2-100.0)                                 | 11.7 (5.8-18.4)                              | <0.001                                  |
| <b>Older patients (<math>\geq</math>69 years):</b> |                                                   |                                              |                                         |
| Temporal Meta-ROI                                  | 85.1 (77.6-91.6)                                  | 17.8 (9.3-27.1)                              | <0.001                                  |
| Entorhinal cortex                                  | 86.1 (78.5-92.5)                                  | 18.8 (10.3-28.0)                             | <0.001                                  |
| Inferior temporal cortex                           | 85.9 (79.4-92.5)                                  | 18.6 (11.2-27.1)                             | <0.001                                  |
| Temporoparietal cortex                             | 88.8 (82.2-94.4)                                  | 21.5 (14.0-29.9)                             | <0.001                                  |
| Braak V-VI                                         | 90.6 (84.1-96.3)                                  | 23.3 (15.0-32.7)                             | <0.001                                  |
| <b>AD dementia vs controls</b>                     |                                                   |                                              |                                         |
| <b>Younger patients (&lt;69 years):</b>            |                                                   |                                              |                                         |
| Temporal Meta-ROI                                  | 95.5 (89.7-100.0)                                 | 8.8 (1.5-17.6)                               | <0.001                                  |
| Entorhinal cortex                                  | 97.0 (92.6-100.0)                                 | 10.2 (2.9-17.6)                              | <0.001                                  |
| Inferior temporal cortex                           | 98.6 (95.6-100.0)                                 | 11.8 (4.4-19.2)                              | <0.001                                  |
| Temporoparietal cortex                             | 97.0 (92.6-100.0)                                 | 10.2 (1.5-19.1)                              | <0.001                                  |
| Braak V-VI                                         | 95.5 (89.7-100.0)                                 | 21.8 (15.0-28.1)                             | <0.001                                  |
| <b>Older patients (<math>\geq</math>69 years):</b> |                                                   |                                              |                                         |
| Temporal Meta-ROI                                  | 95.6 (90.2-98.9)                                  | 31.6 (21.7-41.3)                             | <0.001                                  |
| Entorhinal cortex                                  | 93.6 (88.0-97.8)                                  | 29.5 (19.6-40.2)                             | <0.001                                  |
| Inferior temporal cortex                           | 95.6 (90.2-98.9)                                  | 31.6 (21.7-41.3)                             | <0.001                                  |
| Temporoparietal cortex                             | 95.6 (90.2-98.9)                                  | 31.6 (21.7-41.3)                             | <0.001                                  |
| Braak V-VI                                         | 95.6 (90.2-98.9)                                  | 31.6 (21.7-41.3)                             | <0.001                                  |

**eFigure 1.** Flow diagram of participant inclusion

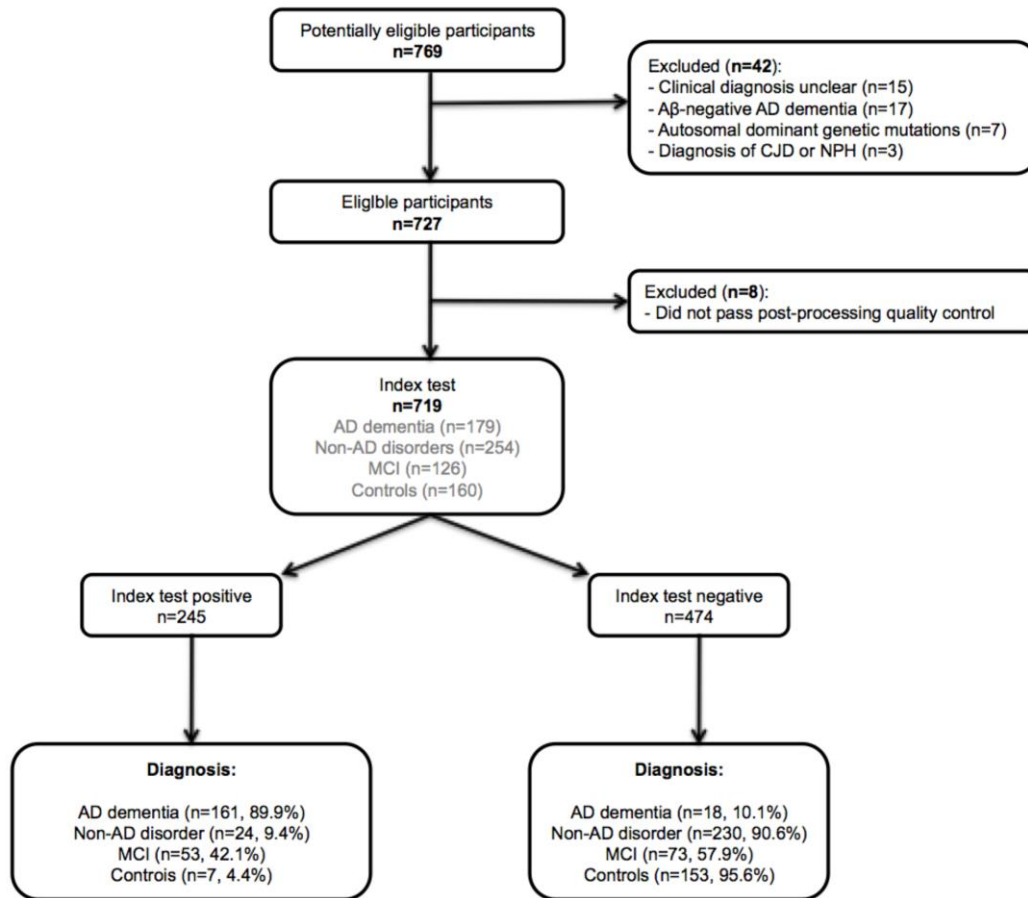

**eFigure 1 Legend:**

The majority of patients visiting the memory clinics of the three sites were invited to participate in this study, and controls were recruited through advertisements or had subjective cognitive decline (i.e. cognitive complaints but normal neuropsychological performance). 796 persons underwent [<sup>18</sup>F]flortaucipir PET and 42 were excluded due to various reasons. Of 727 eligible participants, 8 did not pass quality control and were excluded, resulting in a total of 719 participants that were included in the current study.

**eFigure 2.** [<sup>18</sup>F]flortaucipir uptake in predefined ROIs per group

**eFigure\_2A:** Entorhinal cortex

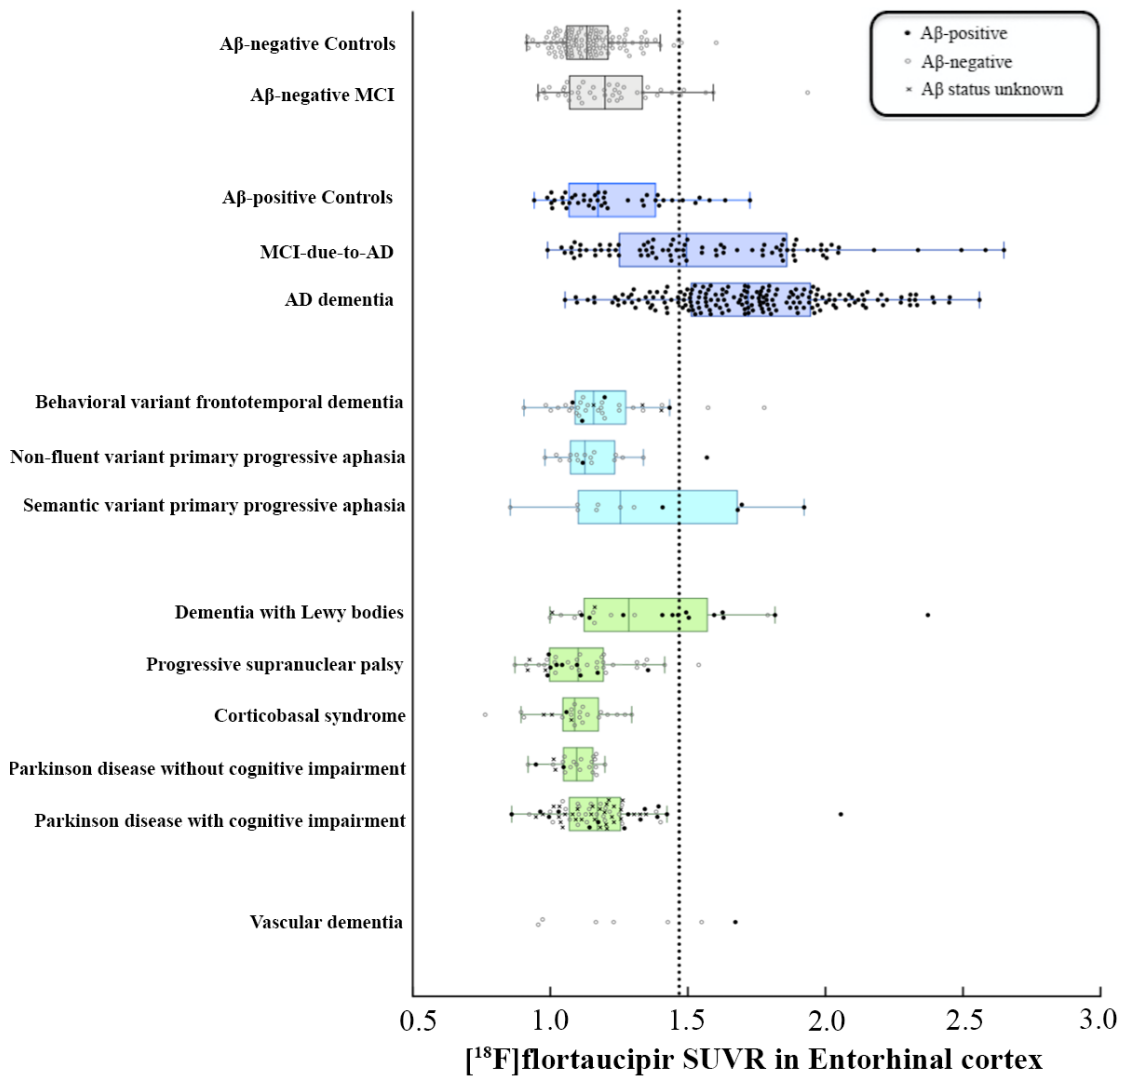

**eFigure\_2B: Inferior temporal cortex**

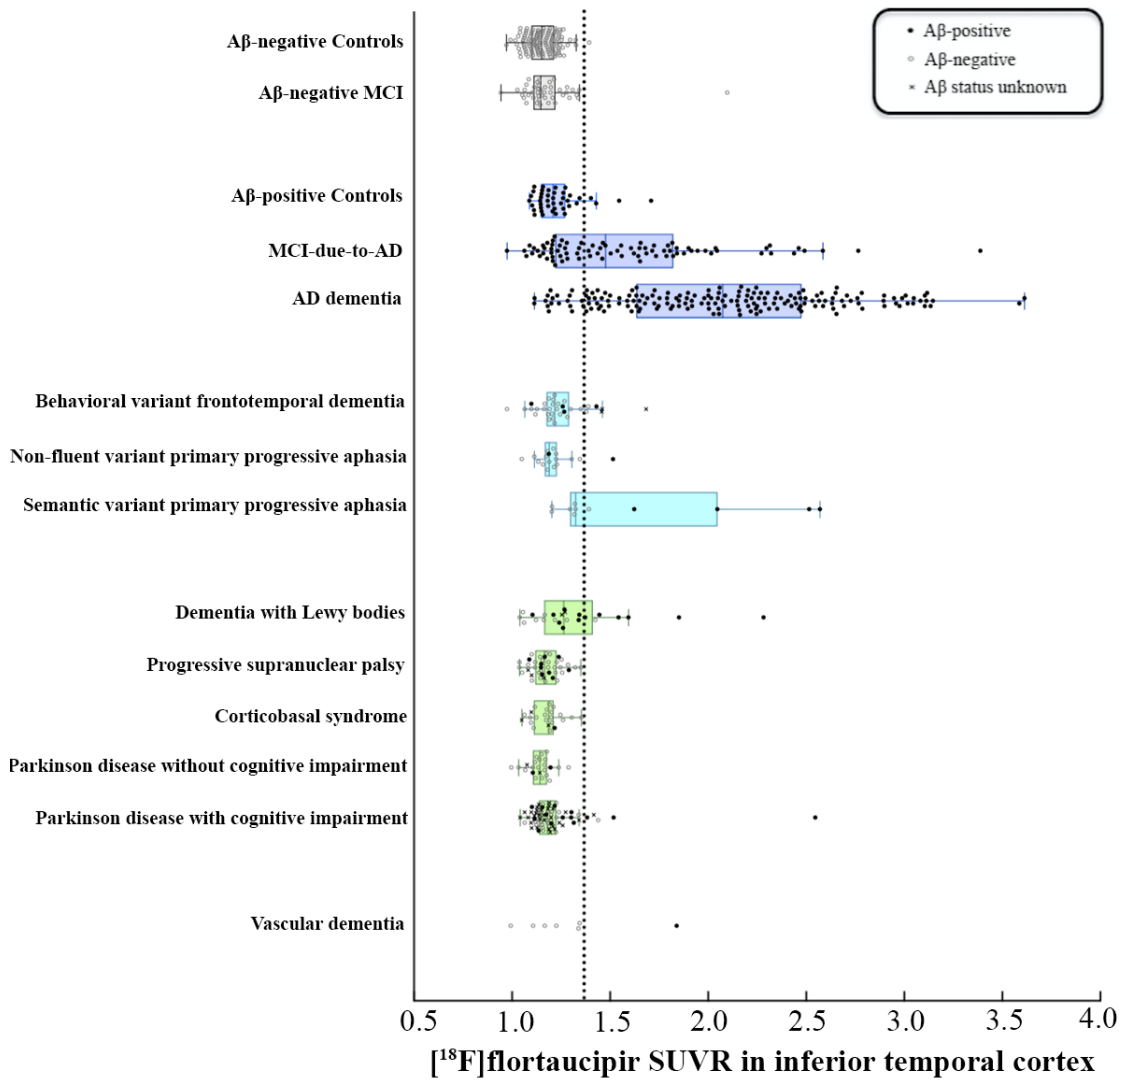



**eFigure\_2C:** Temporoparietal cortex

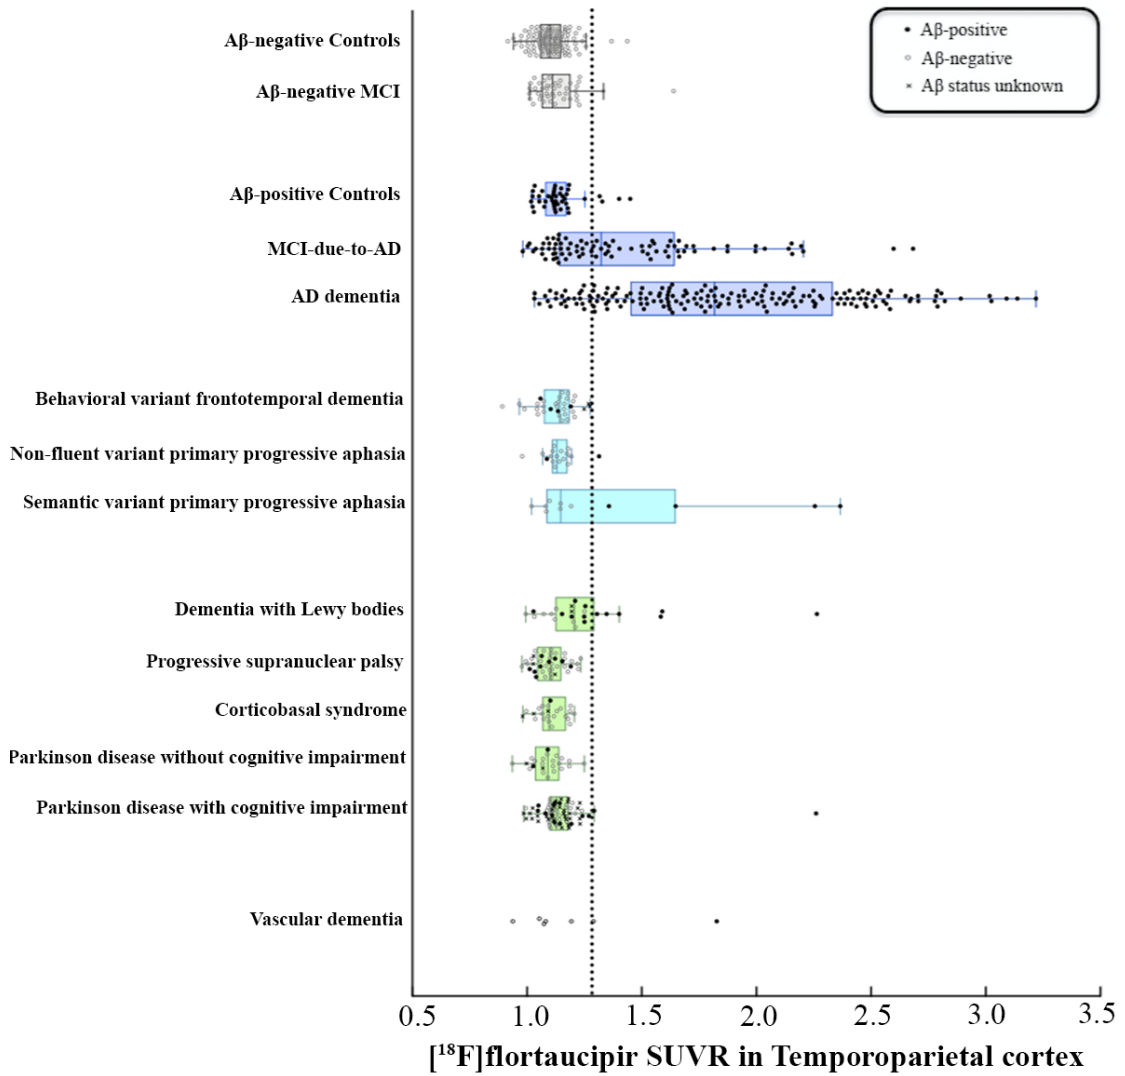

**eFigure\_2D: Braak stage V/VI**

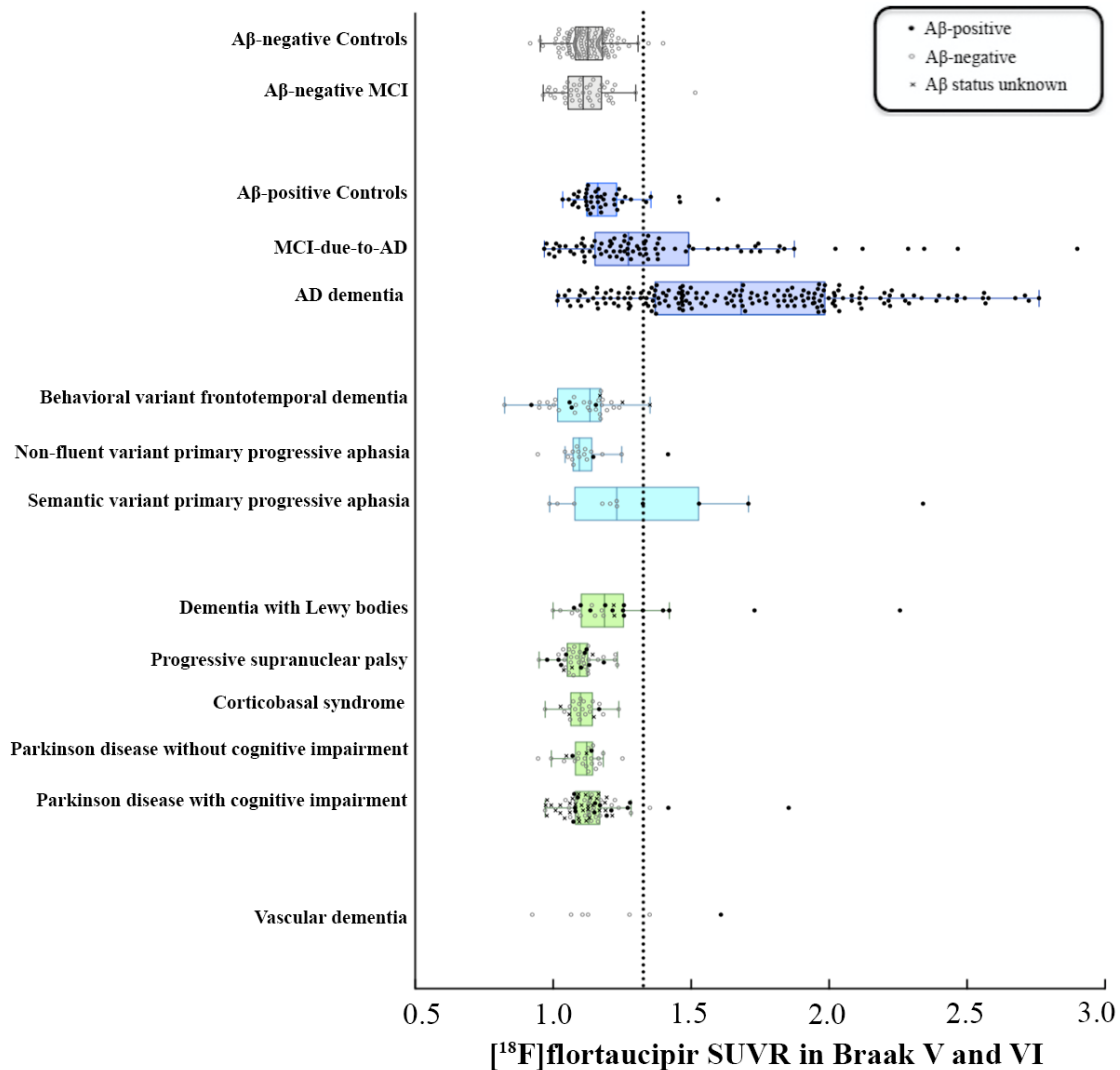

**eFigure 2 Legend:**

Mean  $[^{18}\text{F}]$ flortaucipir uptake across diagnostic groups in the enthorinal cortex (2A), inferior temporal cortex (2B), temporoparietal cortex (2C) and Braak stage V/VI (2D). The dots indicate individuals within the diagnostic groups (filled dots are amyloid- $\beta$  positive, open dots are amyloid- $\beta$  negative, a cross indicates that amyloid- $\beta$  status is unknown). Box-and-Whisker plots are only shown for groups with at least 10 participants. The box ranges from the first to the third quartile, the vertical line represents the median of the diagnostic group and the whiskers indicate the range from the minimum to quartile 1 and from quartile 3 to the maximum excluding outliers. Outliers were defined as SUVR's less than quartile 1 or greater than quartile 3 by more than 1.5 times the interquartile range, and were shown as separate plotted points. The dotted line represents the cut-off, defined using the mean + 2\*SD in all controls for each specific region-of-interest.

SUVR = Standardized uptake value ratio; MCI = Mild cognitive impairment; AD = Alzheimer disease.

**eFigure 3A.** [<sup>18</sup>F]flortaucipir SUVR in Aβ-positive participants only

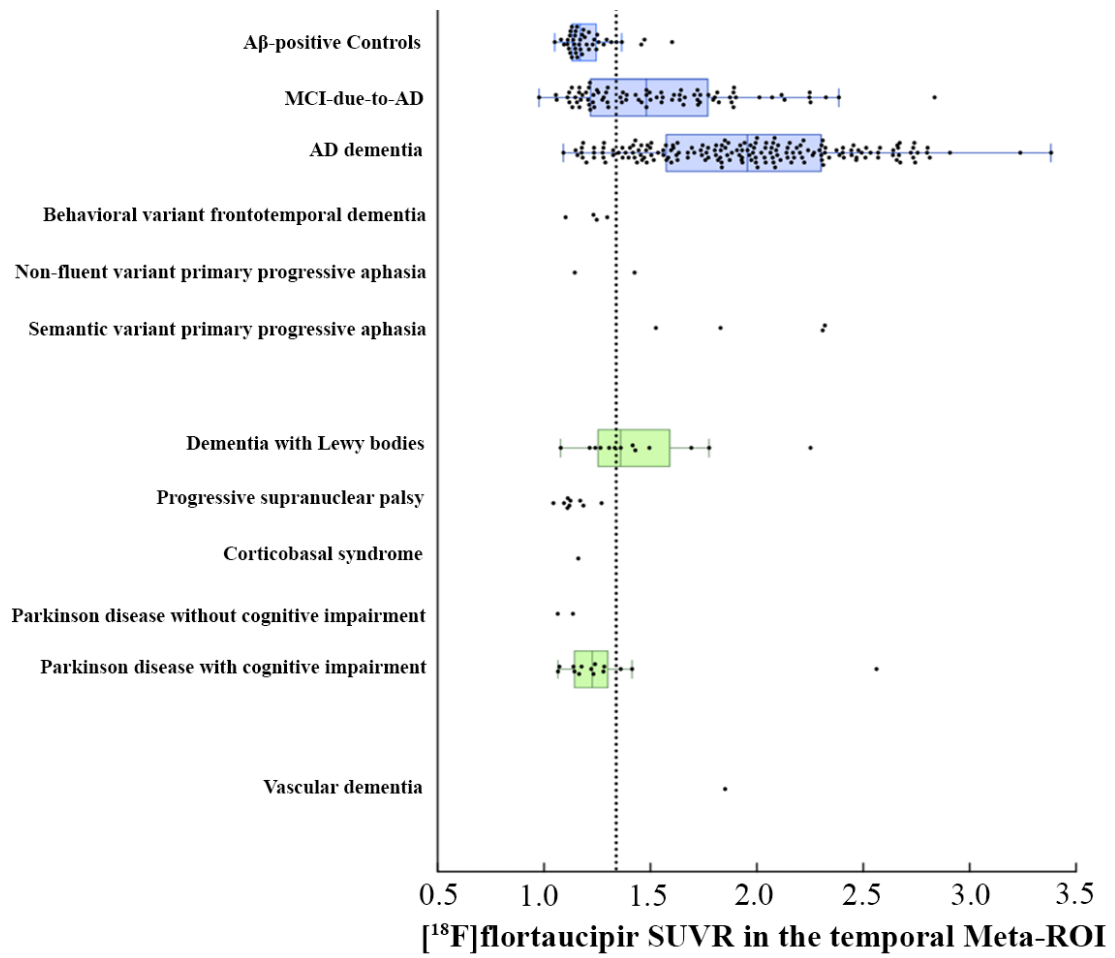

**eFigure 3B.** [<sup>18</sup>F]flortaucipir SUVR in Aβ-negative participants only

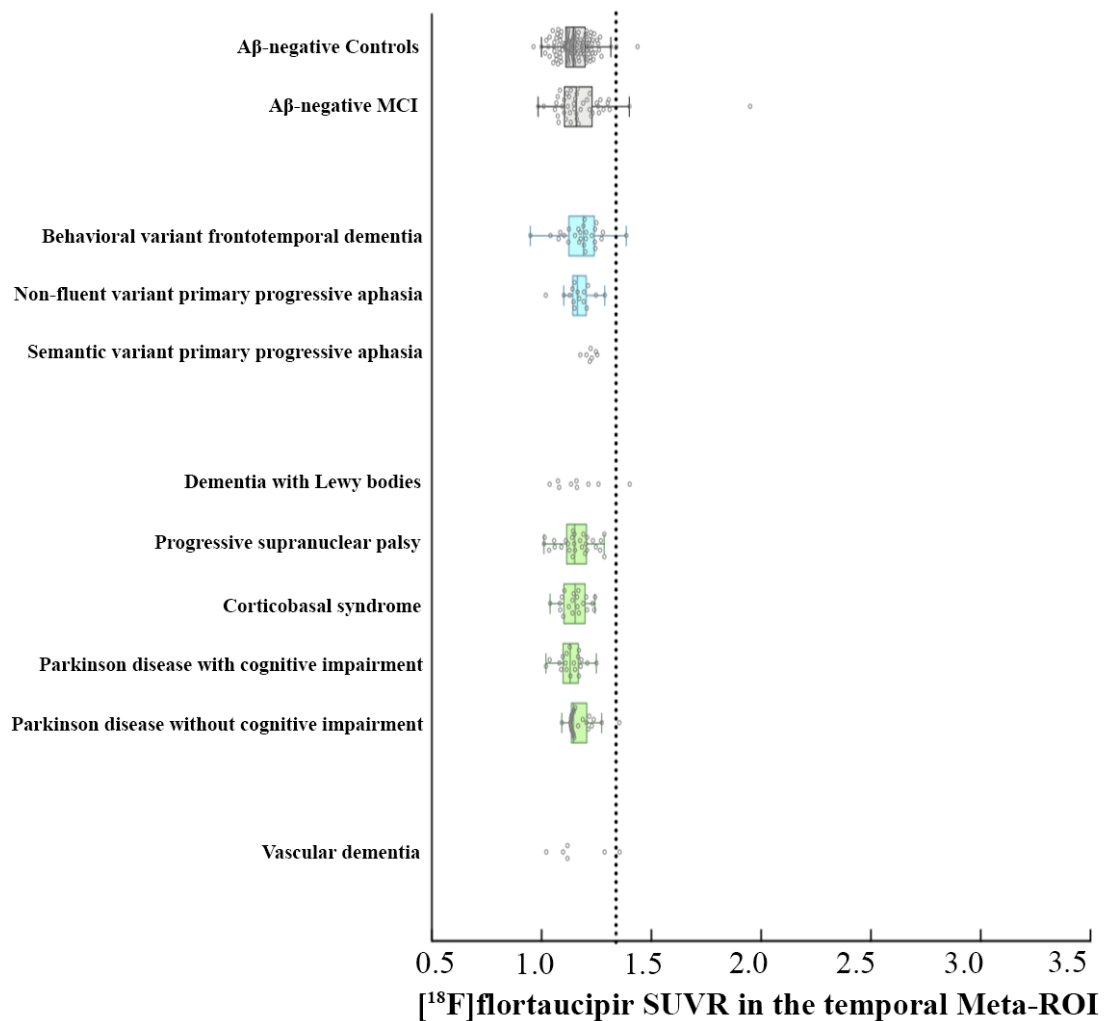

**eFigure 3 Legend:**

Mean [<sup>18</sup>F]flortaucipir uptake across diagnostic groups in the temporal Meta-ROI. The dots indicate individuals within the diagnostic groups. The amyloid-β positive cases are presented in Figure 3A and amyloid-β negative cases in Figure 3B (filled dots are amyloid-β positive, open dots are amyloid-β positive). Box-and-Whisker plots are only shown for groups with at least 10 participants. The box ranges from the first to the third quartile, the vertical line represents the median of the diagnostic group and the whiskers indicate the range from the minimum to quartile 1 and from quartile 3 to the maximum excluding outliers. Outliers were defined as SUVR's less than quartile 1 or greater than quartile 3 by more than 1.5 times the interquartile range, and were shown as separate plotted points. The dotted line represents the cut-off (SUVR: 1.34, defined using the mean + 2\*SD in all controls).

Amyloid-β negative; SUVR = Standardized uptake value ratio; ROI = Region-of-interest; MCI = Mild cognitive impairment; AD = Alzheimer disease.

**eFigure 4.** Differences in specificity between [<sup>18</sup>F]flortaucipir SUVR in the temporal Meta-ROI vs Aβ status

**eFigure 4A.** AD dementia vs non-AD neurodegenerative disorders:

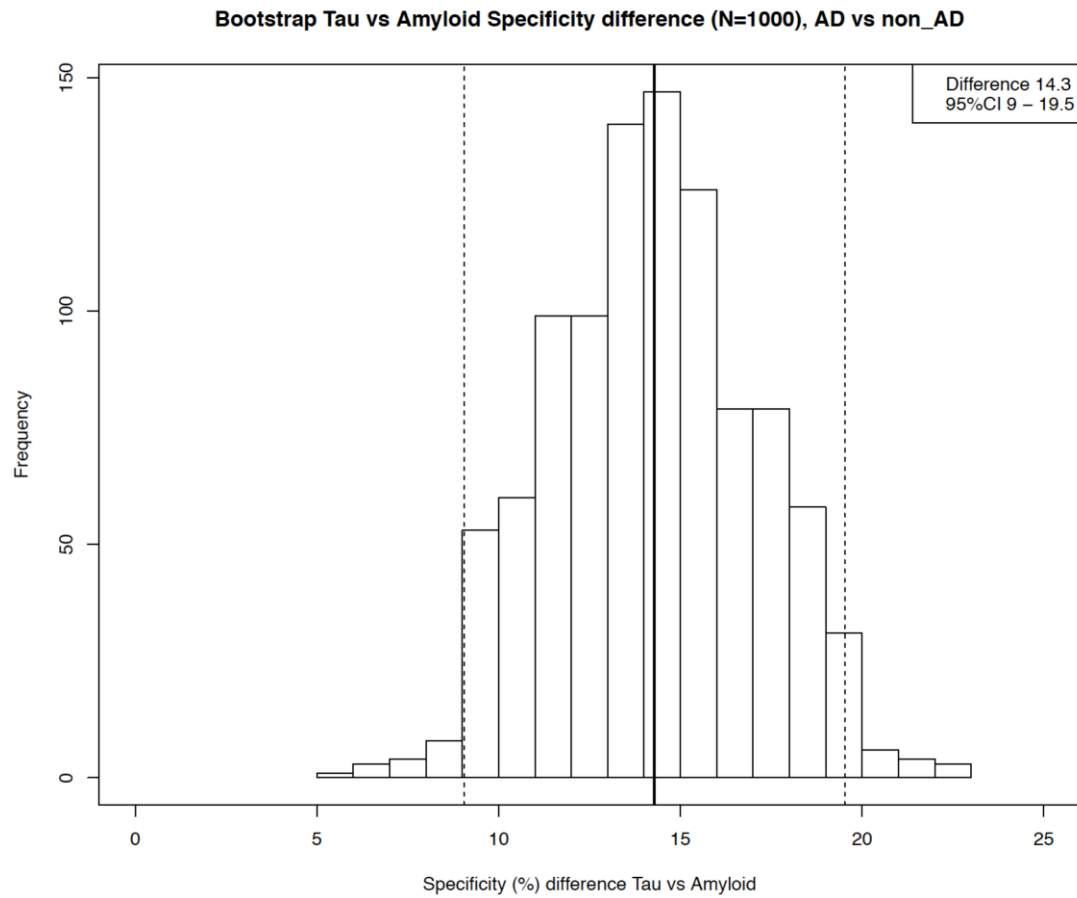

**eFigure 4B.** AD dementia vs controls:

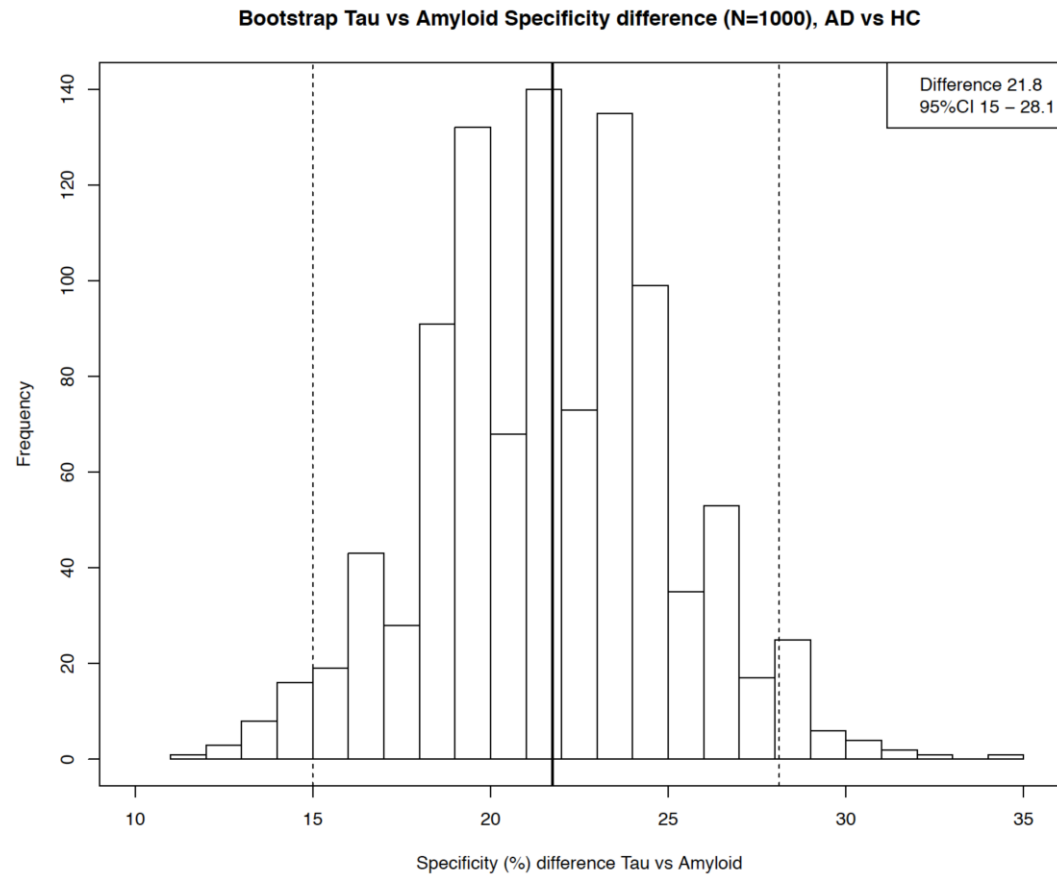

**eFigure 4 Legend:**

Histograms of bootstrapped specificities for the difference between [18F] flortaucipir SUVR in the temporal Meta-ROI vs Aβ status, for AD dementia vs non-AD neurodegenerative disorders (Figure 4A) and AD dementia vs controls (Figure 4B).
