# Supplementary material
Source: PubMed Central journal article supplement (PMC6233630)
Supplement: jama-320-1151-s002.pdf [file jama-320-1151-s002.pdf]

## **Data Sharing Statement**

**Data**

**Data available:** No
